# Supplementary material for: Identification of Candidate Genes for Twinning Births in Dezhou Donkeys by Detecting Signatures of Selection in Genomic Data
Source: Genes (Basel). 2022 Oct 19;13(10):1902. doi: 10.3390/genes13101902 (PMC9601833; doi:10.3390/genes13101902)
Supplement: Supplementary file 1 [file genes-13-01902-s001.zip › Supplementary files/Table S1.xls]

## Sheet: TableS1
Table S1 Summary of sequencing data
Sample Name	Raw Reads （M）	groups	Raw Bases (Gb)	Clean Reads (M)	Clean Bases (Gb)	Clean GC (%)	Clean Q30 (%)
DZDJ01	179.48	single colt group	27.07	177.7	26.71	42.03	93.29
DZDJ02	165	single colt group	24.88	163.03	24.5	42.13	93
DZDJ03	172.27	single colt group	25.98	170.81	25.67	42.12	93.31
DZDJ04	177.07	single colt group	26.7	175.39	26.36	42.21	93.36
DZDJ05	171.47	single colt group	25.86	169.63	25.49	42.22	93.33
DZDJ06	178	single colt group	26.84	176.05	26.46	42.35	93.39
DZDJ07	168.84	single colt group	25.46	166.86	25.07	42.48	93.18
DZDJ08	174.55	single colt group	26.32	173.06	26.01	42.26	93.96
DZDJ09	170.24	single colt group	25.68	168.61	25.34	42.16	93.73
DZDJ10	175.29	single colt group	26.43	173.55	26.07	42.22	93.76
DZSJ01	177.13	twin colt group	26.75	173.77	26.11	42.4	93.96
DZSJ02	206.72	twin colt group	31.21	203.08	30.5	42.5	94.06
DZSJ03	191.3	twin colt group	28.89	187.56	28.17	42.2	94.13
DZSJ04	191.87	twin colt group	28.97	188.56	28.31	42.29	94.25
DZSJ05	208.73	twin colt group	31.05	207.18	30.75	43.15	91.69
DZSJ06	177.59	twin colt group	26.53	176.01	26.22	44.24	90.97
DZSJ07	188.7	twin colt group	28.21	186.73	27.84	43.01	90.36
DZSJ08	186.79	twin colt group	28.21	182.35	27.35	42.44	92.9
DZSJ09	179.84	twin colt group	27.16	175.53	26.35	42.55	93.48
DZSJ10	186.84	twin colt group	28.21	182.34	27.37	42.38	92.65
DZSJ11	181.94	twin colt group	27.47	177.86	26.68	42.65	93.46
