# Supplementary material for: Identification of Candidate Genes for Twinning Births in Dezhou Donkeys by Detecting Signatures of Selection in Genomic Data
Source: Genes (Basel). 2022 Oct 19;13(10):1902. doi: 10.3390/genes13101902 (PMC9601833; doi:10.3390/genes13101902)
Supplement: Supplementary file 1 [file genes-13-01902-s001.zip › Supplementary files/Table S2.xls]

## Sheet: TableS2
Table S2 Summary of mapping statistics
Sample Name	Mapped Ratio（%）	groups	Proper Ratio（%）	Average Depth	Real Depth	Genome Coverage（1×）（%）
DZDJ01	99.19	single colt group	95.29	8.53	8.66	98.51
DZDJ02	99.23	single colt group	94.9	7.73	7.86	98.43
DZDJ03	99.22	single colt group	95.14	8.15	8.28	98.44
DZDJ04	99.22	single colt group	95.27	8.29	8.41	98.5
DZDJ05	99.02	single colt group	94.72	7.59	7.72	98.39
DZDJ06	99.1	single colt group	94.84	7.76	7.89	98.43
DZDJ07	99.03	single colt group	94.65	7.44	7.57	98.34
DZDJ08	99.24	single colt group	95.34	7.6	7.72	98.4
DZDJ09	98.99	single colt group	95.11	7.37	7.49	98.35
DZDJ10	99.16	single colt group	95.31	7.69	7.82	98.42
DZSJ01	99.38	twin colt group	94.52	6.74	6.87	98.15
DZSJ02	99.47	twin colt group	94.63	7.95	8.07	98.45
DZSJ03	99.44	twin colt group	94.61	7.26	7.39	98.31
DZSJ04	99.32	twin colt group	94.59	7.25	7.38	98.28
DZSJ05	99.77	twin colt group	96.73	10.48	10.63	98.6
DZSJ06	99.75	twin colt group	96.4	9.04	9.2	98.23
DZSJ07	99.69	twin colt group	95.79	9.37	9.5	98.61
DZSJ08	99.45	twin colt group	95	8.66	8.79	98.55
DZSJ09	99.55	twin colt group	95.49	8.46	8.59	98.49
DZSJ10	99.48	twin colt group	95.15	8.63	8.76	98.55
DZSJ11	99.49	twin colt group	95.32	8.43	8.56	98.48
