# Supplementary figures and images for: Identification of Candidate Genes for Twinning Births in Dezhou Donkeys by Detecting Signatures of Selection in Genomic Data
Source: MDPI journal article supplement (doi:10.3390/genes13101902), 2022-10-19

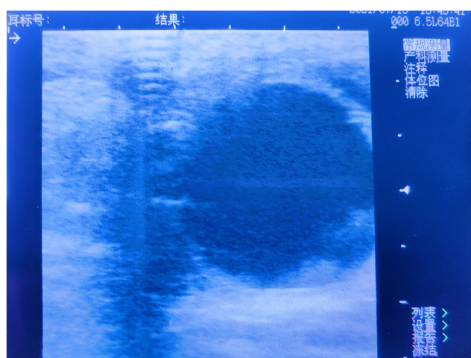

(a)

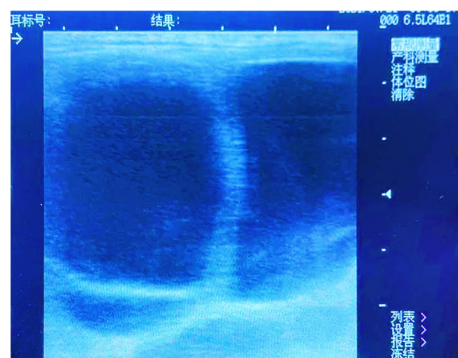

(b)

**Figure S1.** The development of follicle. (a) single follicle; (b) multiple follicles.

Supplement: s1 [file s1]
